# Supplementary material for: Characteristic Photoprotective Molecules from the Sphagnum World: A Solution-Phase Ultrafast Study of Sphagnic Acid
Source: MDPI journal article supplement (doi:10.3390/molecules28166153), 2023-08-21
Supplement: s1 [file s1]

**Characteristic Photoprotective Molecules from the Sphagnum World: A Solution-Phase Ultrafast Study of Sphagnic Acid**

Michael Hymas <sup>1</sup>, Irene Casademont-Reig <sup>1,2</sup>, Stéphane Poigny <sup>3,\*</sup> and Vasilios G. Stavros <sup>1,4,\*</sup>

<sup>1</sup> Department of Chemistry, University of Warwick, Coventry CV4 7AL, UK; michael.hymas@warwick.ac.uk (M.H.); irene.casademont.reig@vub.be (I.C.-R.)

<sup>2</sup> Department of General Chemistry (ALGC), Vrije Universiteit Brussel (VUB), Pleinlaan 2, 1050 Brussels, Belgium

<sup>3</sup> Mibelle Group Biochemistry, Mibelle AG, Bolimattstrasse 1, CH-5033 Buchs, Switzerland

<sup>4</sup> School of Chemistry, University of Birmingham, Edgbaston, Birmingham B15 2TT, UK

\* Correspondence: stephane.poigny@mibellegroup.com (S.P.); v.stavros@bham.ac.uk (V.G.S.)

**A. UV-vis spectra of sphagnic acid**

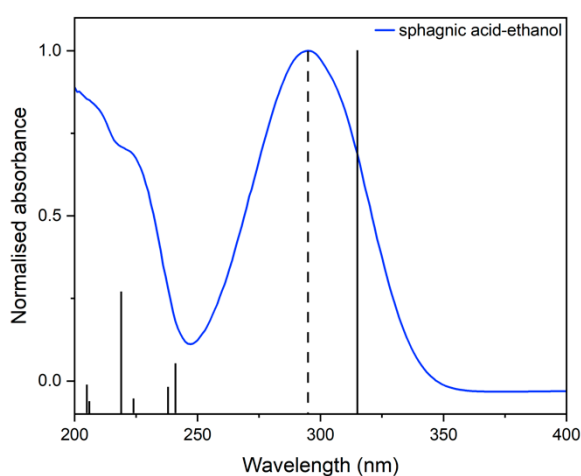

Figure S1: UV-vis spectrum of sphagnic acid in ethanol (obtained using a Cary 60 UV-vis spectrophotometer) (blue); dashed line shows pump wavelength selected for TEAS (295 nm); calculated vertical excitations for sphagnic acid (solid black), computed using B3LYP functional in combination with cc-PVTZ basis set including implicit solvation by ethanol with the PCM model.

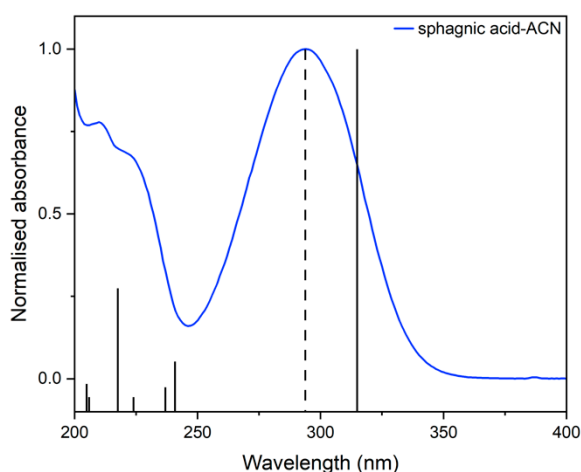

Figure S2: UV-vis spectrum of sphagnic acid in acetonitrile (obtained using a Cary 60 UV-vis spectrophotometer) (blue); dashed line shows pump wavelength selected for TEAS (294 nm); calculated vertical excitations for sphagnic acid (solid black), computed using B3LYP functional in combination with cc-PVTZ basis set including implicit solvation by acetonitrile with the PCM model.

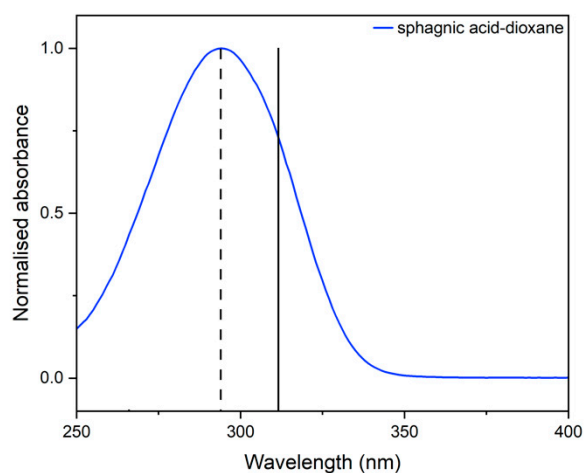

Figure S3: UV-vis spectrum of sphaginic acid in dioxane (obtained using a Cary 60 UV-vis spectrophotometer) (blue); dashed line shows pump wavelength selected for TEAS (294 nm); calculated vertical excitations for sphaginic acid (solid black), computed using B3LYP functional in combination with cc-PVTZ basis set including implicit solvation by dioxane with the PCM model.

## B. Residuals from fitting

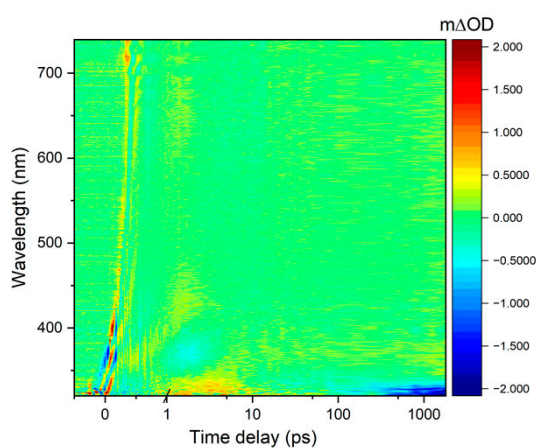

Figure S4: Residuals between Glotaran fits and non-chirp corrected experimental data for sphaginic acid in ethanol

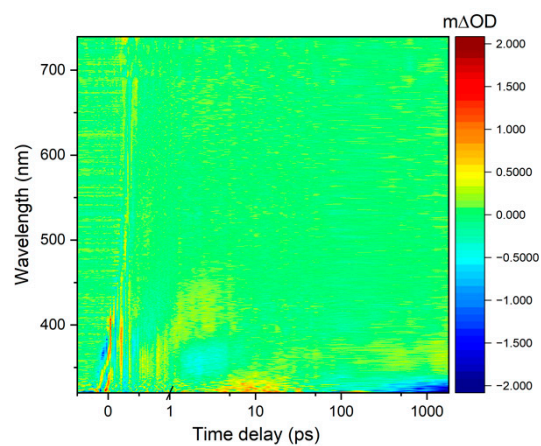

Figure S5: Residuals between Glotaran fits and non-chirp corrected experimental data for sphaginic acid in acetonitrile

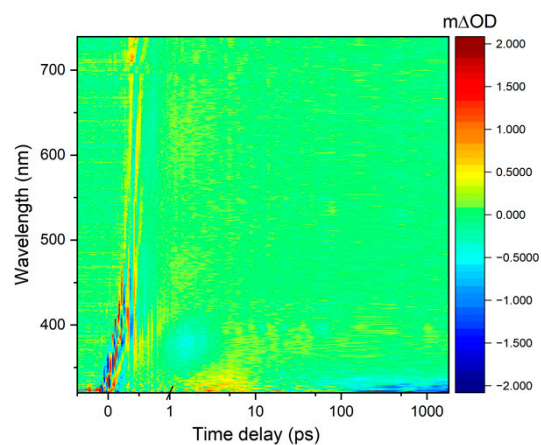

Figure S6: Residuals between Glotaran fits and non-chirp corrected experimental data for sphaginic acid in dioxane

### C. Transient absorption spectra of solvent alone

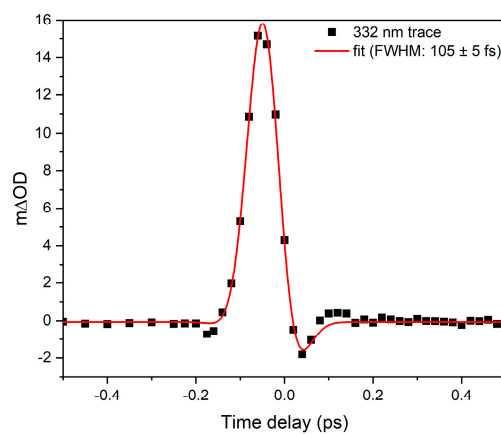

Figure S7: TAS trace at 332 nm of ethanol pumped at 295 nm and fitted with modified Gaussian to gauge instrument response

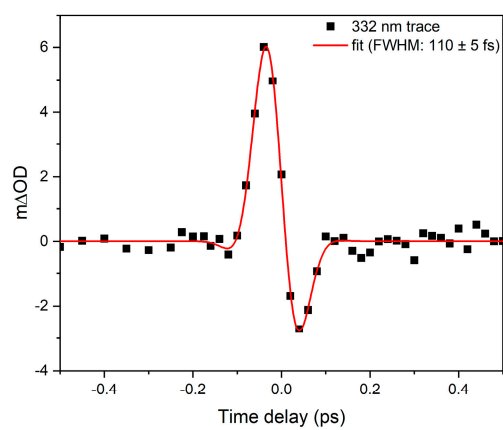

Figure S8: TAS trace at 332 nm of acetonitrile pumped at 294 nm with modified Gaussian fitting to gauge instrument response

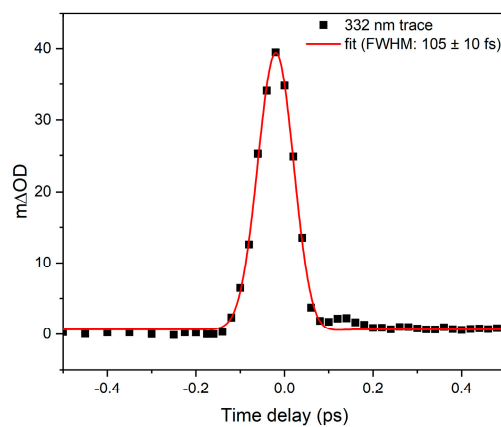

Figure S9: TAS trace at 332 nm of dioxane pumped at 294 nm with modified Gaussian fitting to gauge solvent response

## D. NMR

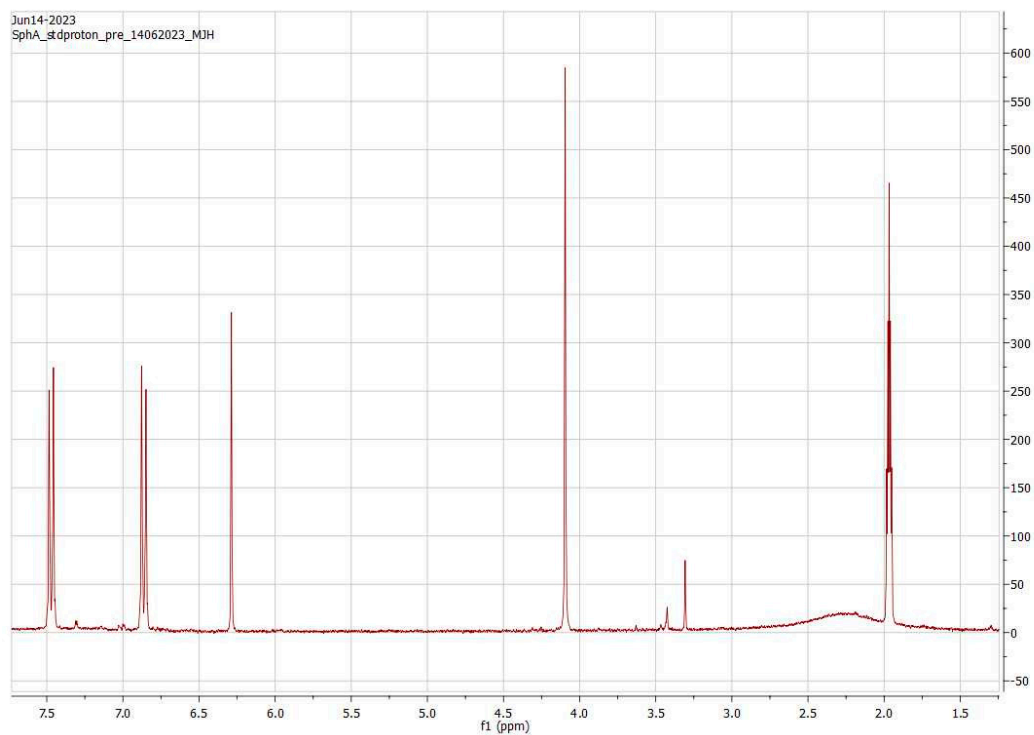

Figure S10: Standard  $^1\text{H}$  NMR of sphaginic acid in  $d_3$ -acetonitrile pre-irradiation with solar simulator

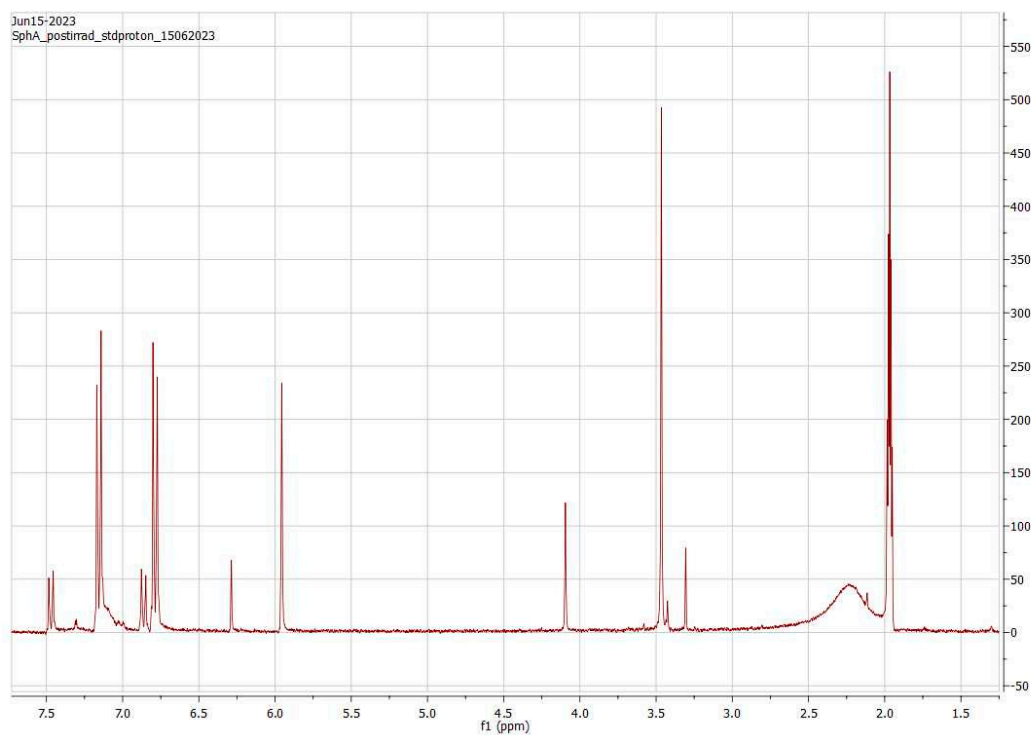

Figure S11: Standard  $^1\text{H}$  NMR of sphaginic acid in  $d_3$ -acetonitrile post-irradiation with solar simulator

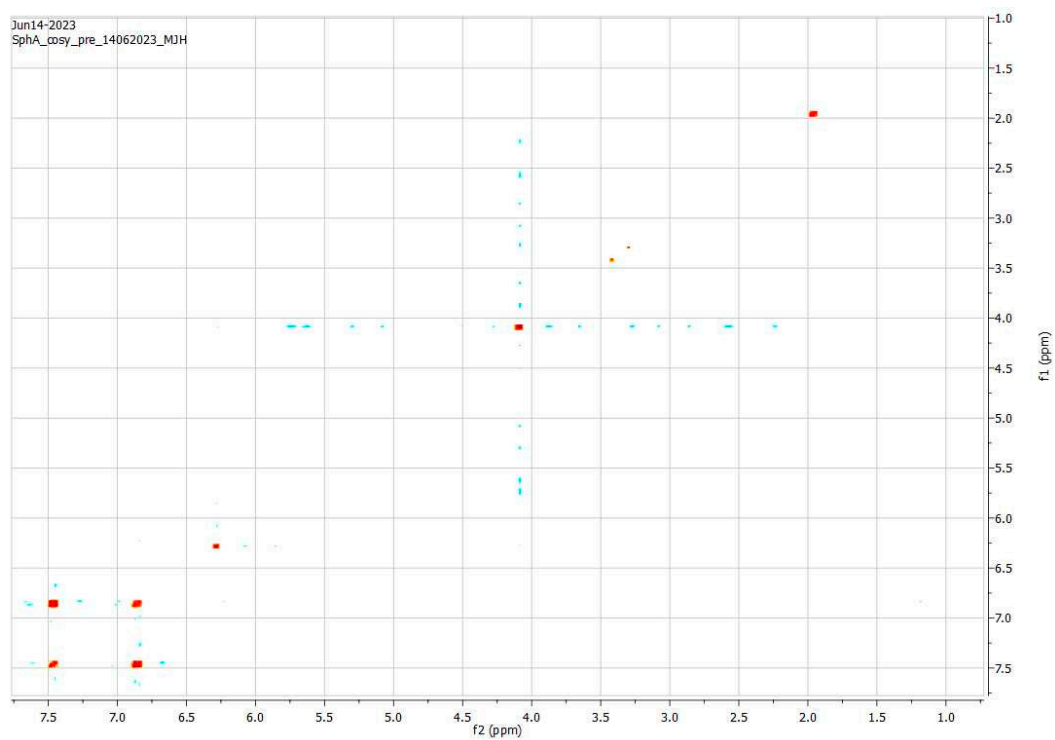

Figure S12:  $^1\text{H}$ - $^1\text{H}$  COSY NMR of sphaginic acid in  $d_3$ -acetonitrile pre-irradiation with solar simulator

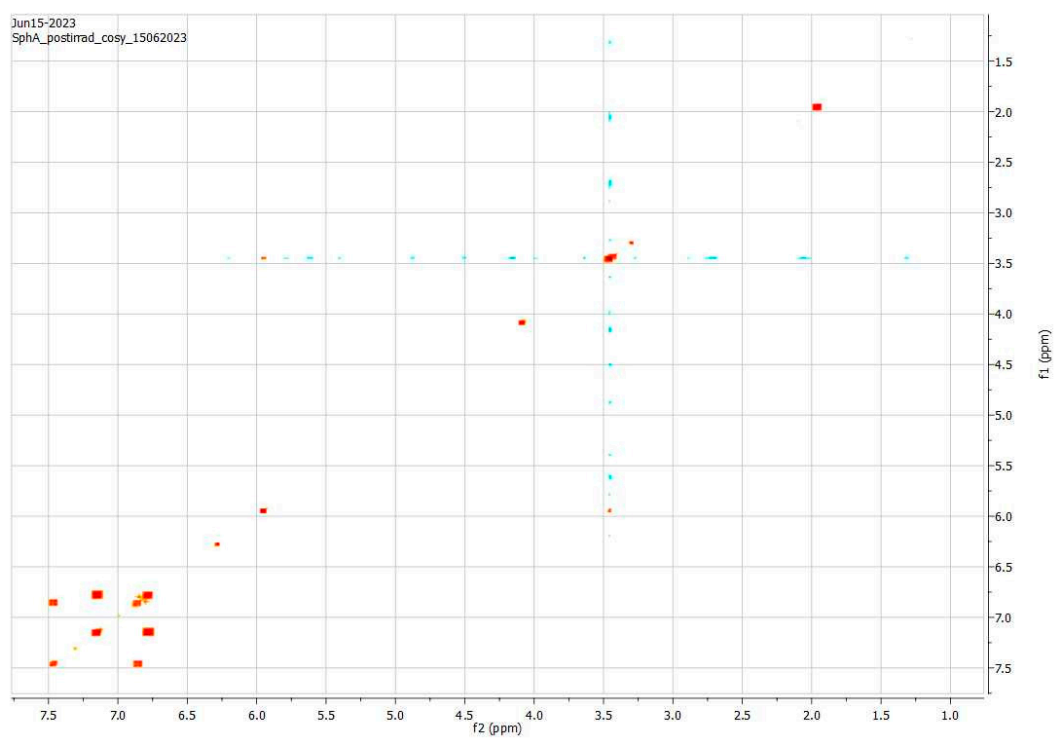

Figure S13:  $^1\text{H}$ - $^1\text{H}$  COSY NMR of sphaginic acid in  $d_3$ -acetonitrile post-irradiation with solar simulator

## E. Stability/photostability of sphaginic acid in solution

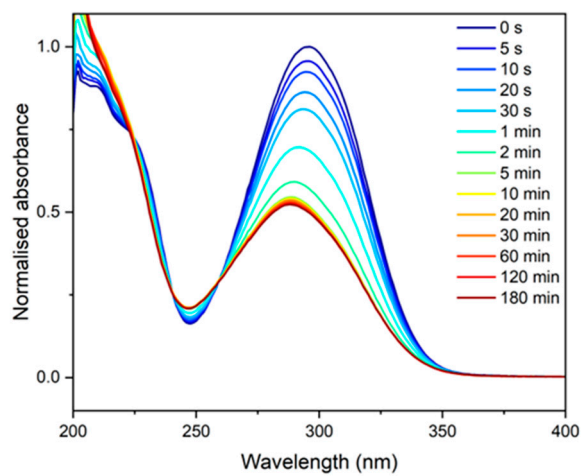

Figure S14: Normalised UV-vis spectra of sphaginic acid in ethanol taken after irradiation at various time intervals using a solar simulator

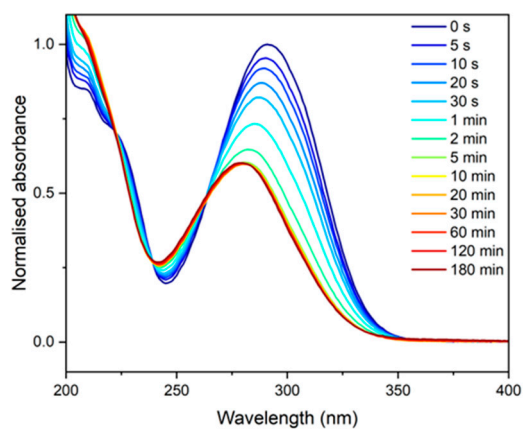

Figure S15: Normalised UV-vis spectra of sphaginic acid in acetonitrile taken after irradiation at various time intervals using a solar simulator

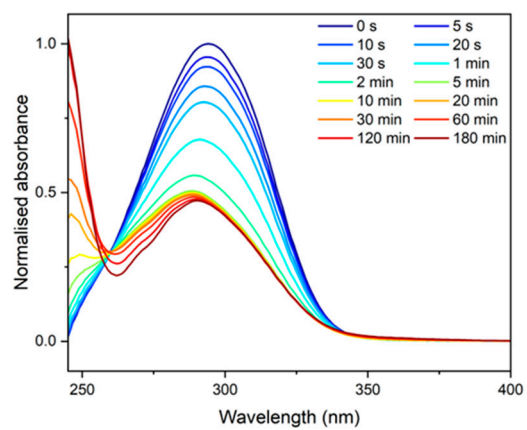

*Figure S16: Normalised UV-vis spectra of sphaginic acid in dioxane taken after irradiation at various time intervals using a solar simulator*
